# Supplementary material
Source: publisher figshare collection journal article supplement (https://gsapubs.figshare.com/ndownloader/files/22411560)
Supplement: Supplementary file 1 [file 22411560]

GEOLOGIC MAP OF THE NACIENTES DEL TENO FORMATION AND ADJACENT  
ROCKS, MAULE (REGION VII), CHILE

Will Junkin and Phil Gans

Department of Earth Sciences, University of California, Santa Barbara  
2019

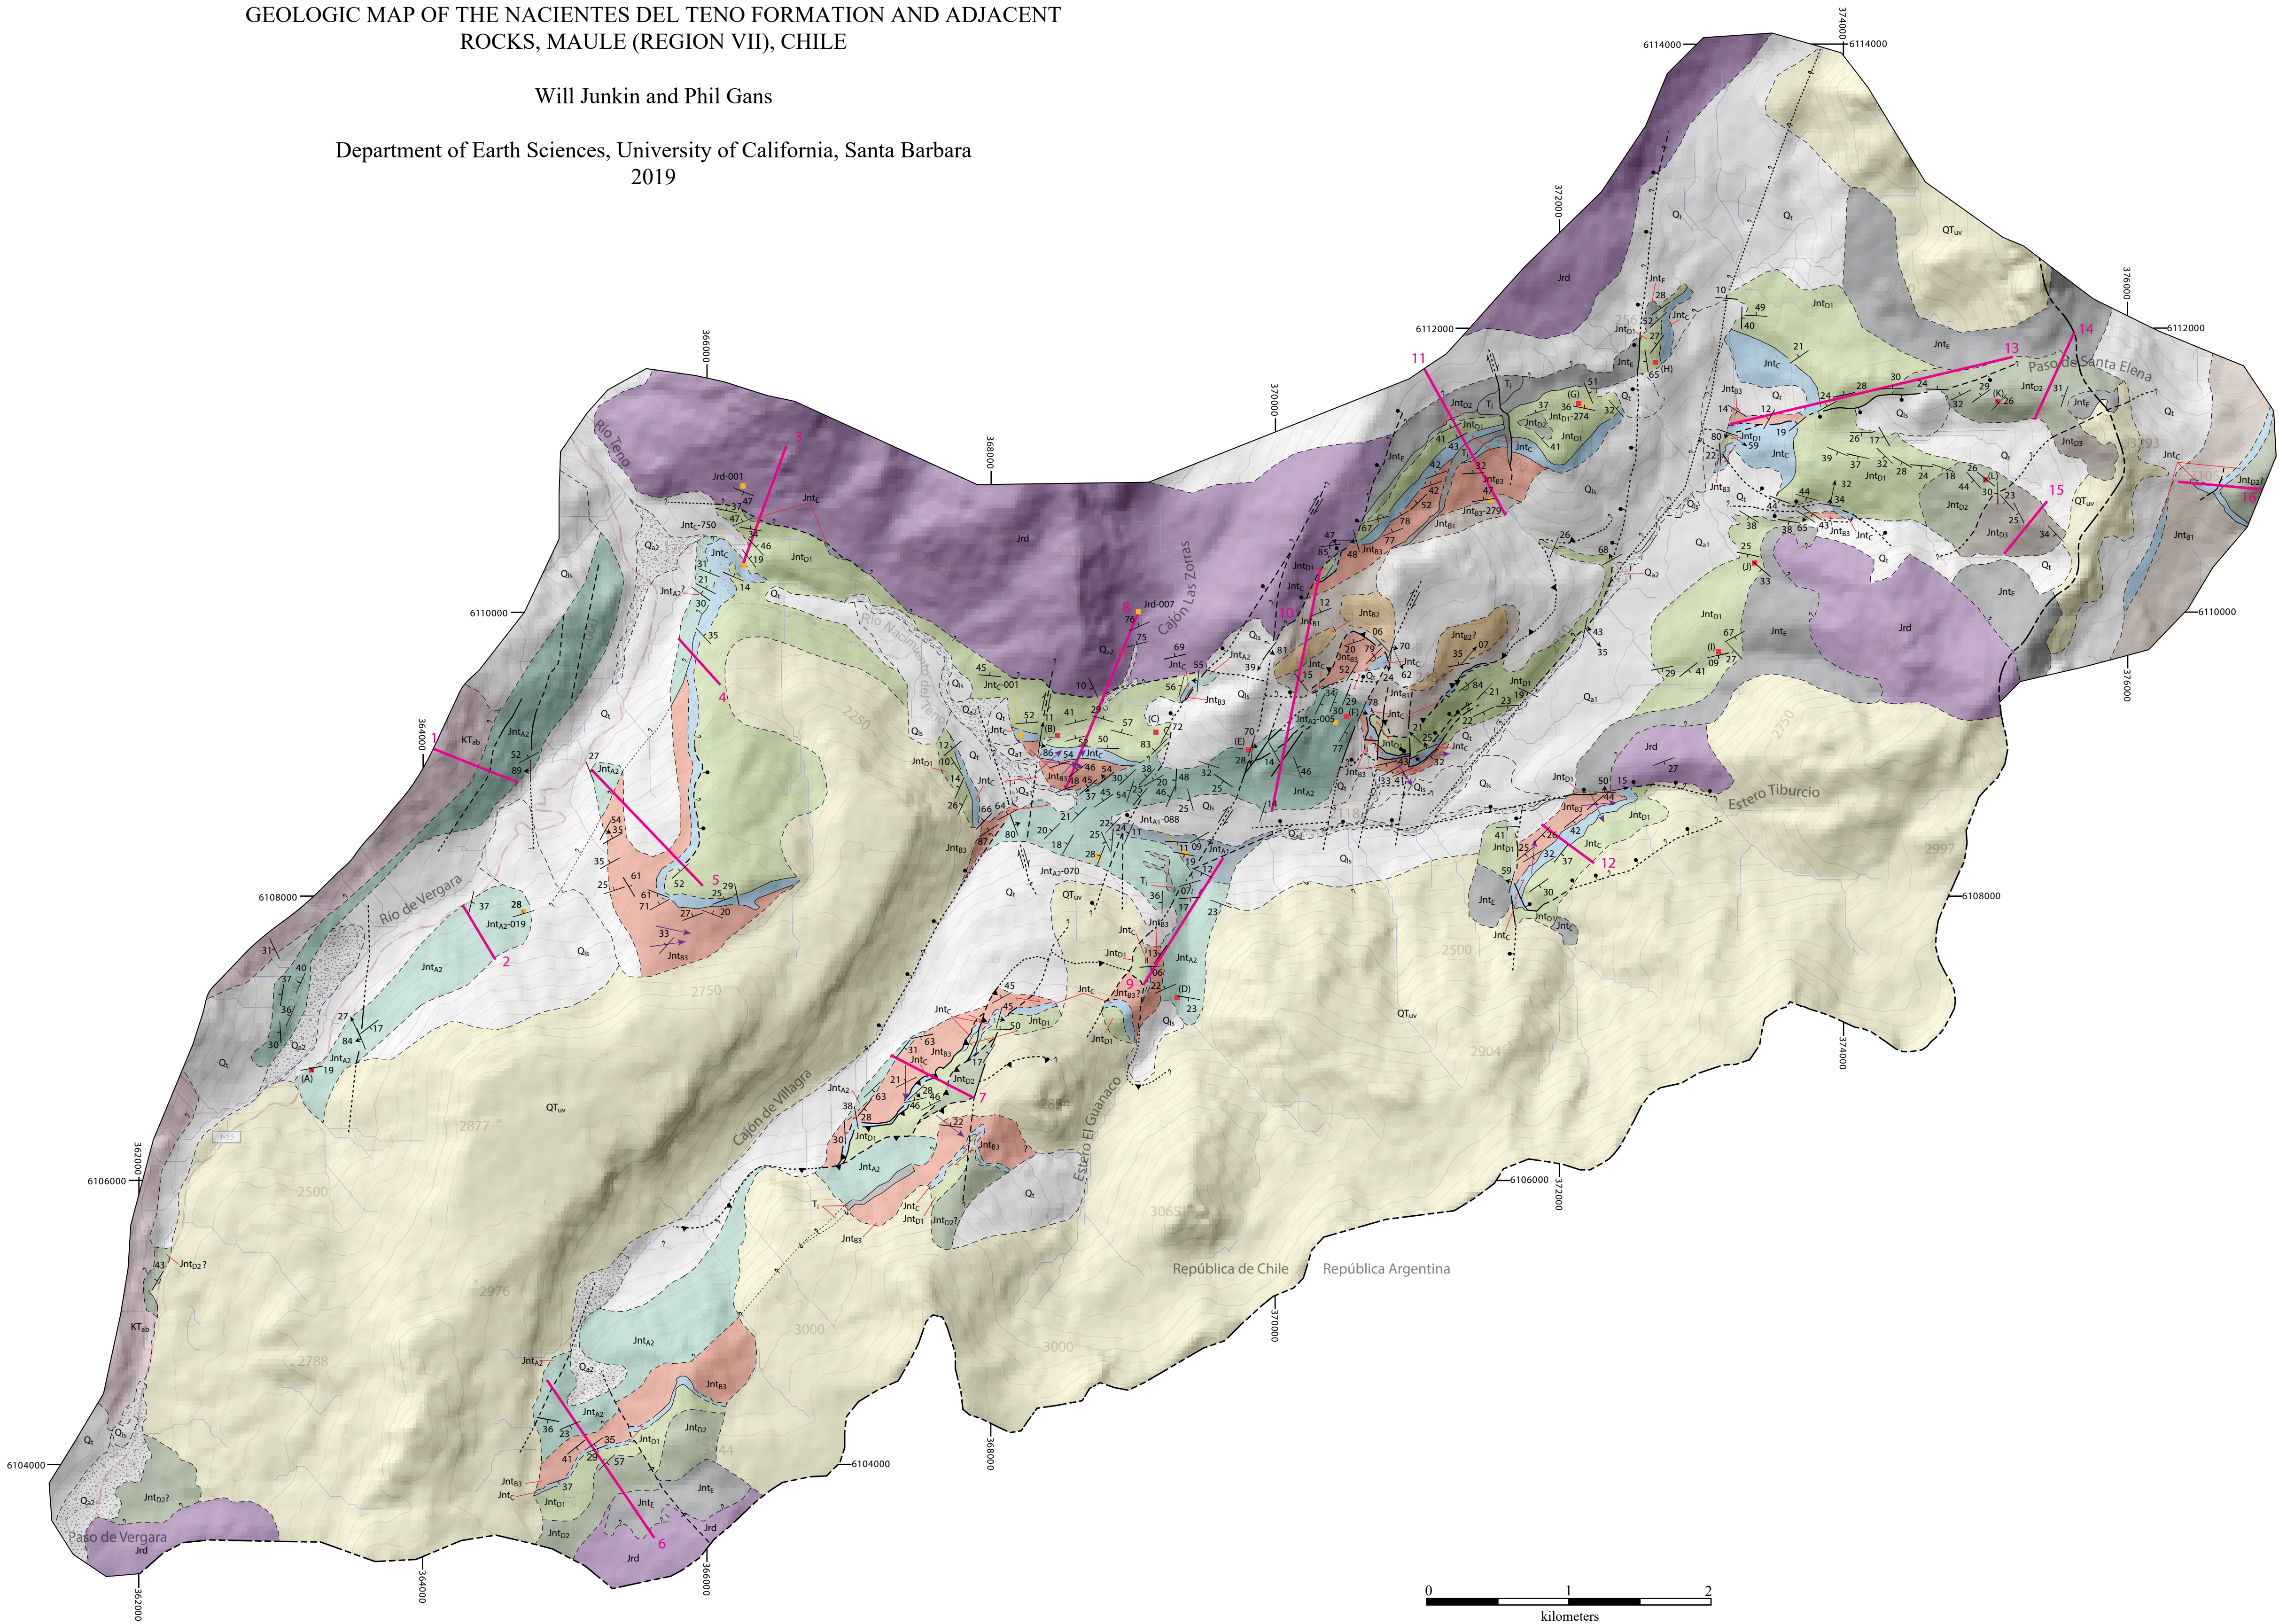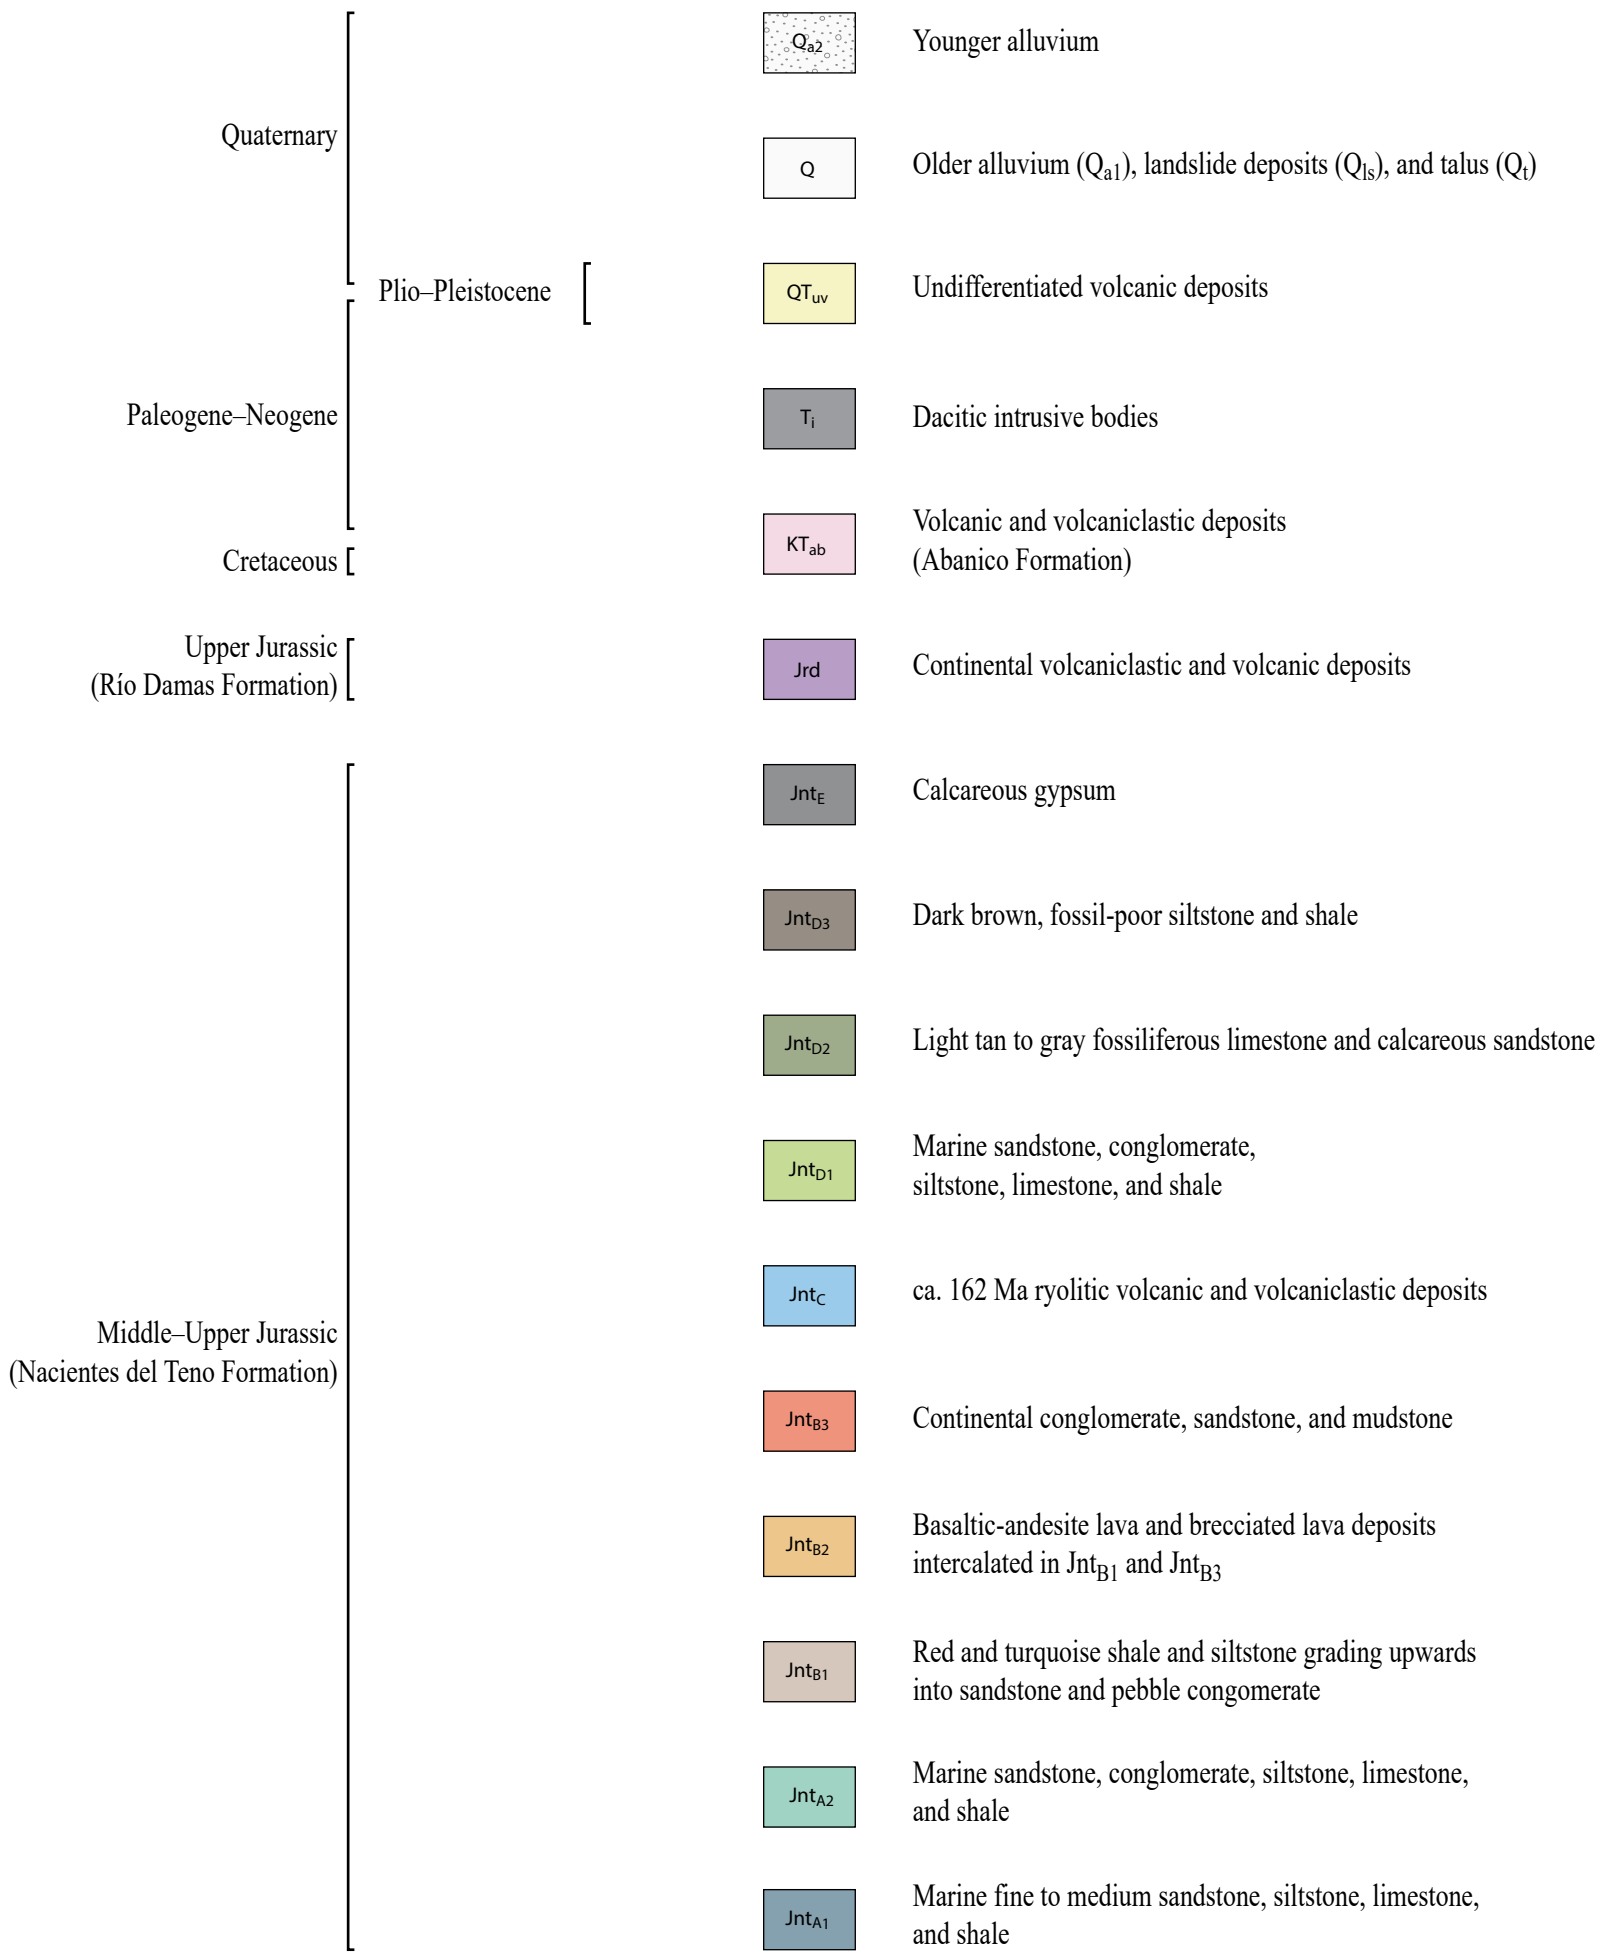

**Contact** Certain and location accurate (solid), approximate or inferred (dashed), concealed (dotted).

**Thrust fault** Certain and location accurate (solid), approximate or inferred (dashed), concealed (dotted); symbol on upthrown side.

**Normal fault** Certain and location accurate (solid), approximate or inferred (dashed), concealed (dotted); symbol on downthrown side.

**Strike-slip fault** Certain and location accurate (solid), approximate or inferred (dashed), concealed (dotted).

**Queried** where identity, existence, lateral continuation, or location uncertain.

**Inclined bedding**

**Overturned bedding**

**Fault plane and lineation**

**Sample locality**

**Ammonite locality**

**Stratigraphic column locality**

**Unidirectional paleocurrent indicator**

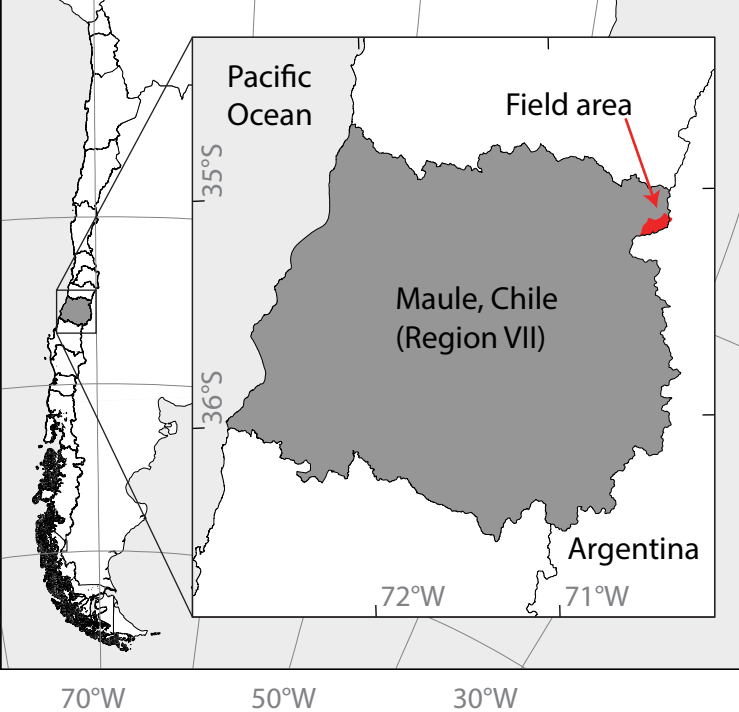

UNIVERSAL TRANSVERSE MERCATOR (UTM) GRID AND JANUARY, 2017 MAGNETIC NORTH DECLINATION AT CENTER OF SHEET

Projection: UTM Zone 19S

Datum: World Geodetic System (WGS) 1984

Spot elevations, roads, streams, nomenclature, national border (unofficial): Instituto Geografico Militar de Chile "Lagunas de Teno" 25 Minute Series (1985)

Projection: Transverse Mercator

Datum: Provisional South American Datum 1956

Topographic contours and shaded relief base map: Shuttle Radar Topography Mission 1 Arc-Second Global Digital Elevation Model

Projection: UTM Zone 19S

Datum: WGS 1984

CONTOUR INTERVAL 50 METERS
